# Supplementary material
Source: publisher figshare collection journal article supplement (https://tandf.figshare.com/ndownloader/files/18365081)
Supplement: Supplementary file 1 [file 18365081]

## Sheet: Sheet1
Bq kg-1
	Point ID	1	2	3	4	5	6	7	8	9	10	11	12	13	14	15	16	17	18	19	20	21	22	23	24	25	26	27	28	29	30	31	32	33	34	35	36	37	38	39	40	41	42	43	44	45	46	47	48
Depth	0-1 cm	82964.3	32914.9	96.8036	19294.8	39547.4	95251.2	25535	53245.9	32210	79452.2	123.683	138909	86400.2	81210.1	71112.8	46506.8	18796.3	130986	80621	92942.9	55791.7	61360.3	72461.6	92624.4	71045.5	37223	42722.7	719.26	83316.5	24622.9	95128.4	181234	117425	50213.7	81494	137611	77370.7	56230.6	25101.9	105872	13835.5	83588.3	93124.2	52441.6	78405.7	117715	70187.3	33162.5
	1-2 cm	40811.7	34578.8	1679.6	22017.4	34631.1	64716.4	24621.9	14229.9	35682.9	75957.8	609.261	105393	43292	75835.1	74812.5	65429.8	32837.5	104058	48907.3	64783.3	32494.7	19837.4	60821.4	21452.9	33673.8	19918.1	16542.8	721.827	101768	10980.7	68044.9	108092	176881	9911.18	117954	117233	53768.3	52859.4	39384.8	45486.3	14421	64742.2	111388	45220.4	59112.6	41030.1	45912.7	36830.5
	2-3 cm	25260	18762.6	19562.7	6813.87	28451.3	34853.5	43664.2	23083	37069.3	19876.4	2219.08	69706.1	28638.1	63194.8	80836.7	72460.2	37792.6	73192.7	35239	15466.1	8609.72	16237.4	34982.6	7700.66	47934.1	16656.8	9854.48	9849.85	66825.4	4099.71	51146.3	51849.6	124907	6252.92	99167.2	66461.6	28774	17006.6	57646.1	14091	18760	49759.8	153782	38302.5	60873.7	36411.5	67798.2	38033.3
	3-4 cm	22121.3	15880.1	26264.8	2893.32	9787.28	25719.9	25796.5	8888.84	28781.2	4736.51	24637.3	26095.6	22142	55136.9	29480	29771.4	14974	55322.3	26229.7	1005.66	1238.92	17941.7	11176.2	3763.64	29472.4	10566.2	2219.37	46615.4	35547.1	3219.4	25426	12638.1	34192.1	4980.18	29379.9	29026.9	7648.13	10877	89337.3	2775.96	28811.1	20386.9	169340	59687.1	49329.3	22740	29860	29751.2
	4-5 cm	11349.2	53273	29044.8	6493.62	16021.9	36594.5	48676.2	10581.4	32598.3	2430.52	28264	10874.8	9428.84	38580.6	23166.3	12350.3	6960.92	46003.8	16263.7	2195.11	1955.39	8236.46	10035.3	4497.85	56788.5	11300.5	2062.2	43781.1	11392.2	3880.36	22171.1	10262.5	6340.54	22728.7	10289.1	3623.5	5322.39	6878.28	121022	3139.23	27399.4	11707.4	119741	11851	49740.7	12073.1	37572.5	33556.3
	5-6 cm	3890.31	11578.1	14646.2	7940.6	28905.9	25575.7	29977.9	7561.35	20012.4	3813.71	13225.6	5739.14	2954.09	16345.4	26119.9	4655.98	5420.47	29760.5	9437.04	2368.86	2907.7	4965.68	8403.28	3479.81	26691.4	28188.4	13410.6	51651.2	3882.6	9792.47	15155.5	4613.47	6095.07	4580.15	7102.64	3051.81	4345.03	6177.05	214696	2868.58	16264.7	5214.37	65102.5	4549.47	23069.4	6018.38	17489.7	20732.3
	6-8 cm	5648.54	2745.47	10674.9	7443.71	27477.6	9832.79	20168.8	7803.88	14356.7	675.641	3737.59	1374.88	2582.93	12241.3	7730	1108.78	3711.77	32954.7	2222.9	2179.47	10063.7	9847.76	5324.56	8055.69	10302.7	22043.3	5130.9	29321.1	2474.01	4739.76	7224.88	2013.36	5657.13	1750.09	3769.92	1946.44	4023.37	1995.98	132697	1440.86	11073.6	1792.59	20484.9	1685.32	13442.2	2336.66	5358.73	14809.4
	8-10 cm	7194.85	1424.1	3491.4	7953.98	8872.05	9277.76	8407.94	5266.47	11834.3	473.057	4475.32	1144.55	1230.28	13300.2	4255.06	943.402	2010.04	8021.11	1595.01	1166.14	9246.61	13948	2821.68	7503.01	4778.05	10249.2	1313.79	11619.7	1127.41	2384.88	2079.97	8479.13	3029.19	1296.29	3604.71	868.35	1283.93	400.58	7746.86	825.023	5625.11	592.761	5991.17	1331.95	7000.15	-299.971	2822.75	12252.8
[truncated: 34 more columns]
